# Supplementary material for: Generation of Multiple Arbovirus-like Particles Using a Rapid Recombinant Vaccinia Virus Expression Platform
Source: MDPI journal article supplement (doi:10.3390/pathogens11121505), 2022-12-09
Supplement: s1 [file s1]

## Supplementary Materials

**Supplementary Table S1.** Cloning and sequencing primers for POWV constructs

| Purpose                                                  | Sequence (5' → 3')   |
|----------------------------------------------------------|----------------------|
| vIND-POWV (prototype lineage) PCR amplification, forward | TCTCAATGGCTAAGGCGTC  |
| vIND-POWV (prototype lineage) PCR amplification, reverse | AGATCCAGCTTGCCTTCCAC |
| vIND-POWV (prototype lineage) sequencing                 | ACGTCAACGGGTTCTTCCTC |
| vIND-POWV (DTV lineage) PCR amplification, forward       | TCTCAATGGCTAAGGCGTC  |
| vIND-POWV (DTV lineage) PCR amplification, reverse       | CGGGATGACCACAGACCTTC |
| vIND-POWV (DTV lineage) sequencing                       | ACACCATTCTCCCATGTCCG |

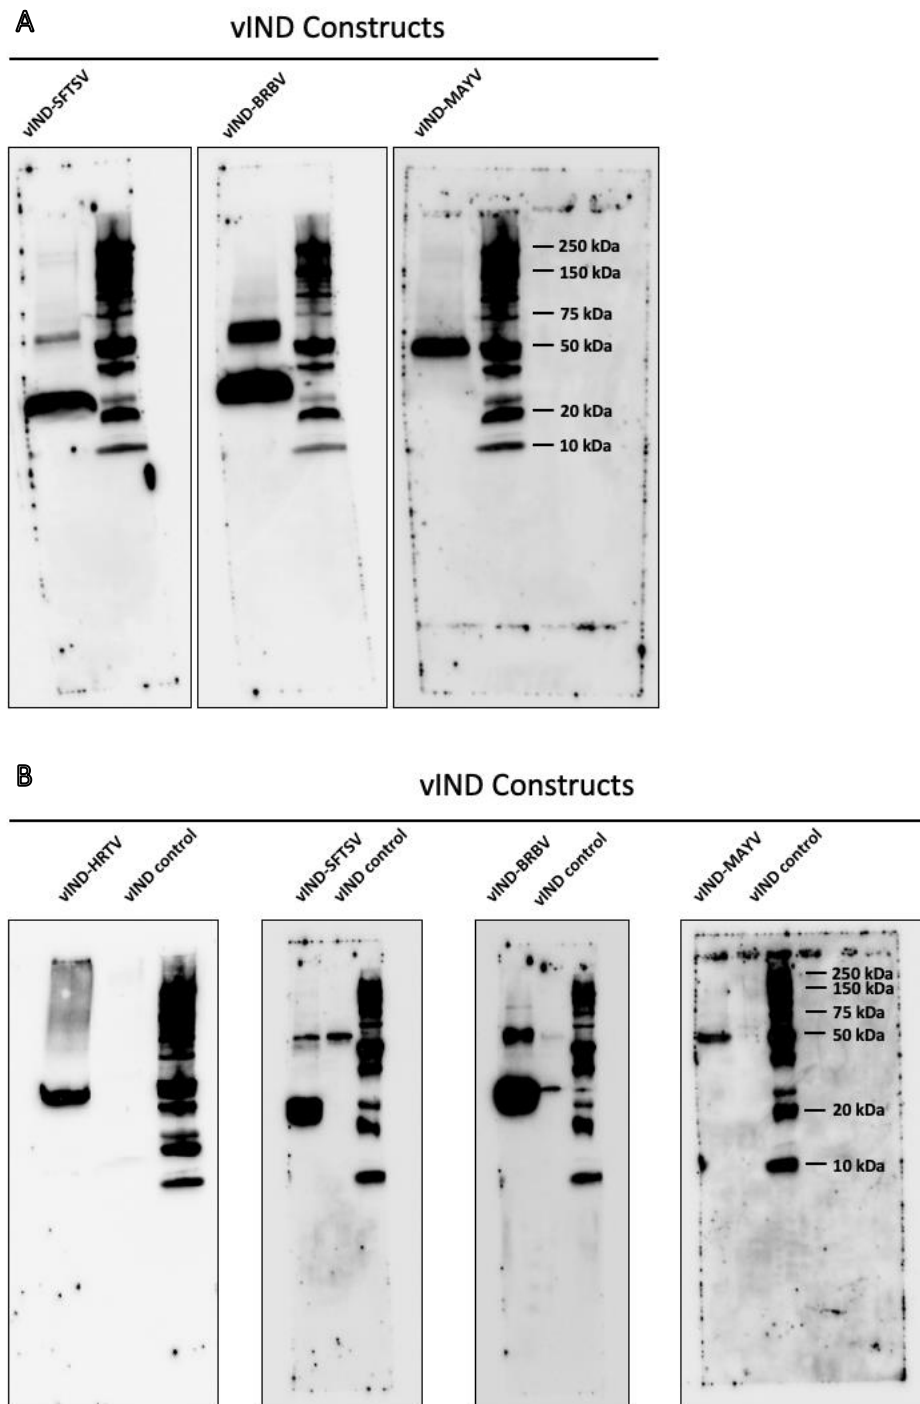

**Supplementary Figure S1.** Detection of protein expression (vIND-HRTV, vIND-SFTSV, vIND-BRBV, and vIND-MAYV) in western blots. PEG precipitated VLP samples were harvested from Vero cells infected with each vIND construct. A vIND that does not encode any gene of interest was used to infect Vero cells to generate a negative control. The negative control was PEG precipitated in the same manner as the test vINDs. (A) Western blots without a negative control. (B) Western blots with a negative control included.

vIND-POWV  
DTV lineage

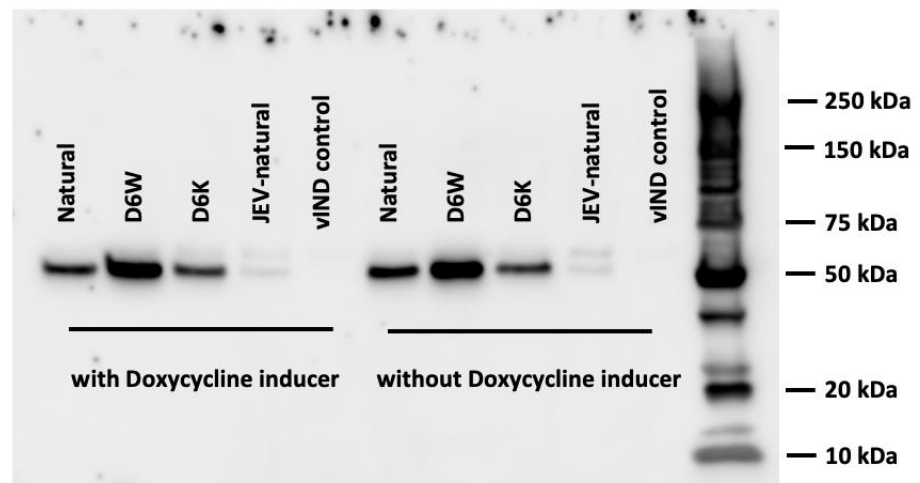

**Supplementary Figure S2.** Detection and comparison of protein expression (vIND-POWV) in western blots. PEG precipitated VLP samples were harvested from Vero cells infected with each vIND construct. A vIND that does not encode any gene of interest was used to infect Vero cells to generate a negative control. The negative control was PEG precipitated in the same manner as the test vINDs. Whole protein concentration of each POWV VLP sample was quantitated by Qubit 4 fluorometer (Invitrogen) to ensure equal loading amount. Two sets of Vero cells were infected, with one set in the presence of doxycycline inducer, thus allowing replication of the vINDs.

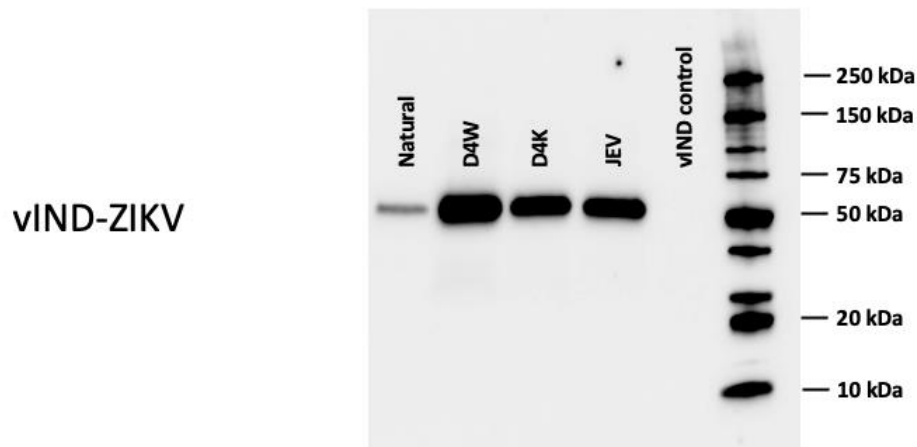

**Supplementary Figure S3.** Detection and comparison of protein expression (vIND-ZIKV) in western blots. Detailed information of ZIKV genes, VLP production, and western blot conditions can be found in our previous study [30]. PEG precipitated VLP samples were harvested from Vero cells infected with each vIND construct in the absence of doxycycline inducer. A vIND that does not encode ZIKV genes was used to infect Vero cells to generate a negative control. The negative control was PEG precipitated in the same manner as the test vINDs. TGX stain-free gel (Bio-Rad) was imaged before membrane transfer to ensure equal amount of protein was loaded to each well.
